# Supplementary material for: Evaluating parental personal utility of pediatric genetic and genomic testing in a diverse, multilingual population
Source: PubMed Central journal article supplement — HGG Adv. 2024 Jun 24;5(3):100321. doi: 10.1016/j.xhgg.2024.100321 (PMC11284555; doi:10.1016/j.xhgg.2024.100321), 2024-06-24
Supplement: mmc1.pdf [file mmc1.pdf]

**Supplemental information**

**Evaluating parental personal utility  
of pediatric genetic and genomic testing  
in a diverse, multilingual population**

**Priya N. Marathe, Sabrina A. Suckiel, Katherine E. Bonini, Nicole R. Kelly, Laura Scarimbolo, Beverly J. Insel, Jacqueline A. Odgis, Monisha Sebastin, Michelle A. Ramos, Miranda Di Biase, Katie M. Gallagher, Kaitlyn Brown, Jessica E. Rodriguez, Nicole Yelton, Karla Lopez Aguiñiga, Michelle A. Rodriguez, Estefany Maria, Jessenia Lopez, Randi E. Zinberg, George A. Diaz, John M. Grealley, Noura S. Abul-Husn, Laurie J. Bauman, Bruce D. Gelb, Melissa P. Wasserstein, Eimear E. Kenny, and Carol R. Horowitz**

## Supplemental Materials

**Figure S1. Distrust in the competence of the healthcare system by education**

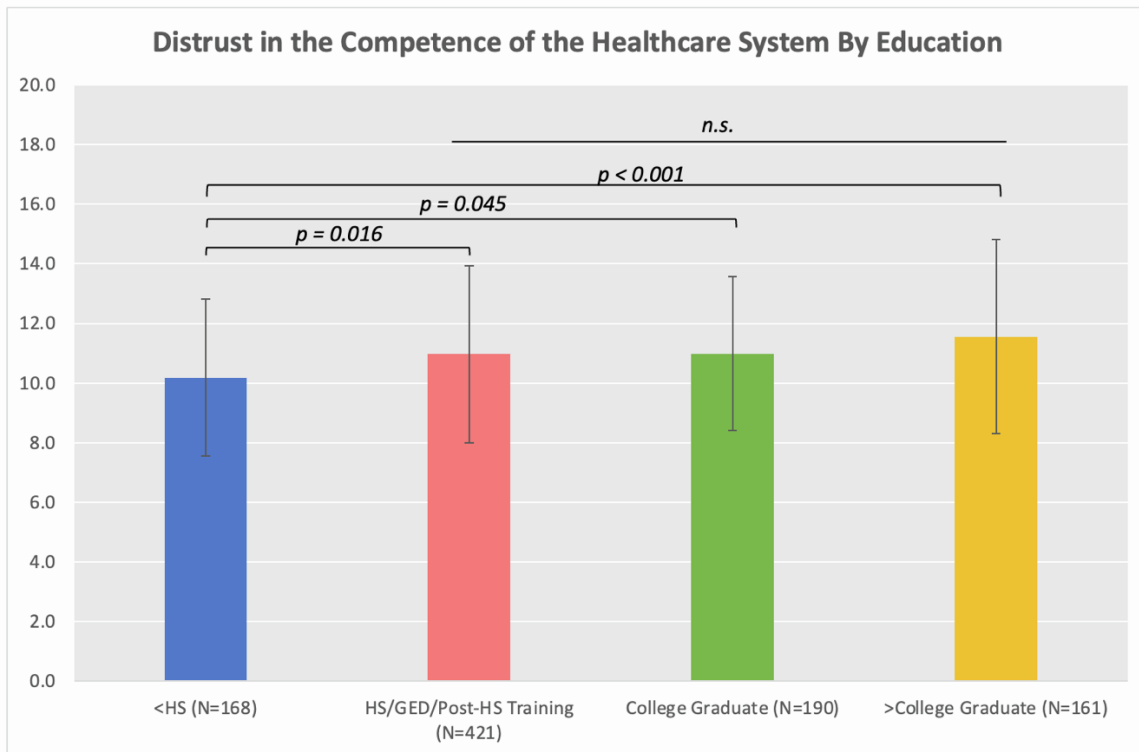

**Figure S1.** ANOVA and post hoc Tukey tests between highest level of education completed by parents/guardians and distrust in the competence of the healthcare system displayed above (( $F(3,936) = 6.3, p = 0.001$ ). Displayed p-values reflect post-hoc Tukey results (n.s. = not significant). Those with less than a high school education scored significantly lower on the distrust scale compared to the other three education levels. No differences found between HS/GED/Post-HS Training, College Graduate and >College Graduate.

Abbreviations: HS: High school; GED: General Education Development Test

**Figure S2. Personal utility summary score across three largest population groups**

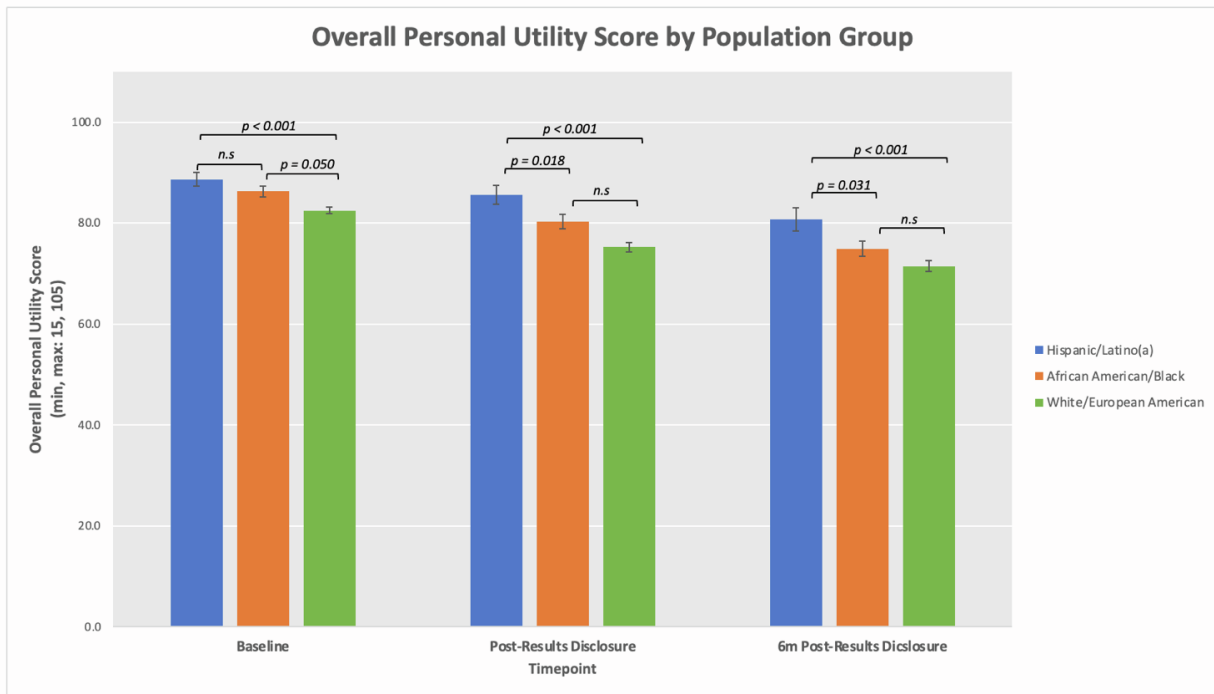

**Figure S2.** ANOVA and post-hoc Tukey tests between overall personal utility score and the three largest population groups (Hispanic/Latino(a) (H/L), African American/Black (AA) and European American (EA)) across three time points (baseline:  $F(2,786) = 12.5$ ,  $p < 0.001$ ; post-results disclosure:  $F(2,785) = 19.5$ ,  $p < 0.001$ ; 6m post-results disclosure:  $F(2,713) = 12.0$ ,  $p < 0.001$ ). Displayed p-values reflect post-hoc Tukey results (n.s. = not significant). Post-results disclosure, H/L participants had greater personal utility scores than EA and AA participants. At baseline, H/L participants had greater personal utility than EA participants, but H/L and AA participants did not significantly differ. At post-results disclosure and 6m post-results disclosure, no differences found between AA and EA.

**Table S1. Factor analysis of the adapted pediatric Personal Utility Scale (PrU) measure (N=944)**

| Survey item <sup>a</sup>                                           | Factor 1 <sup>b</sup> ( <i>Practical Utility</i> ) | Factor 2 <sup>c</sup> ( <i>Informational Utility</i> ) | Factor 3 <sup>d</sup> ( <i>Parental Psychological Utility</i> ) |
|--------------------------------------------------------------------|----------------------------------------------------|--------------------------------------------------------|-----------------------------------------------------------------|
| 1. Help with my child's life planning                              | 0.78                                               | 0.29                                                   | 0.20                                                            |
| 2. Inform plans for my child's school or career                    | 0.82                                               | 0.18                                                   | 0.17                                                            |
| 5. Help me or our family mentally prepare for the future           | 0.19                                               | 0.10                                                   | 0.96                                                            |
| 6. Help to better understand my child's health                     | 0.17                                               | 0.12                                                   | 0.96                                                            |
| 7. Contribute to my child's self-knowledge                         | 0.67                                               | 0.38                                                   | 0.23                                                            |
| 8. Help me cope with my child's health risks                       | 0.74                                               | 0.39                                                   | 0.25                                                            |
| 9. Help me feel more in control of my child's health               | 0.78                                               | 0.33                                                   | 0.20                                                            |
| 10. Help me feel more in control of my child's life                | 0.77                                               | 0.30                                                   | 0.19                                                            |
| 11. Simply to provide information                                  | 0.31                                               | 0.75                                                   | 0.08                                                            |
| 12. Satisfy my curiosity about my child                            | 0.43                                               | 0.65                                                   | 0.15                                                            |
| 13. Help my child use social programs, like resources and services | 0.79                                               | 0.28                                                   | 0.17                                                            |
| 14. Improve communication with my family members                   | 0.78                                               | 0.28                                                   | 0.19                                                            |
| 15. Feel good about helping the medical community                  | 0.23                                               | 0.79                                                   | 0.13                                                            |
| 16. Feel good about having information for family members          | 0.45                                               | 0.64                                                   | 0.17                                                            |
| 17. Feel good about taking responsibility for my child's health    | 0.35                                               | 0.76                                                   | 0.16                                                            |

<sup>a</sup> Original scale consisted of 17 items; however, only 15 items were used in this analysis, two items (items 3 and 4) were removed a priori since they were not applicable to the entire study cohort

<sup>b</sup> Scale reliability for Practical Utility: Cronbach's  $\alpha = 0.94$

<sup>c</sup> Scale reliability for Informational Utility: Cronbach's  $\alpha = 0.87$

<sup>d</sup> Scale reliability for Parental Psychological Utility: Cronbach's  $\alpha = 0.97$

**Table S2. Outcomes assessed to evaluate personal utility**

| Measures                                                     | Survey question                                                                                                                                                                                                                                                                                                                                                                                                                                                                                                                                                                                                                                                                                                                                                                                                                                                                                                                                                                                                                                                                                              | Response options                                                                                                                                | Source                                                                                  | Time point |                         |                            |
|--------------------------------------------------------------|--------------------------------------------------------------------------------------------------------------------------------------------------------------------------------------------------------------------------------------------------------------------------------------------------------------------------------------------------------------------------------------------------------------------------------------------------------------------------------------------------------------------------------------------------------------------------------------------------------------------------------------------------------------------------------------------------------------------------------------------------------------------------------------------------------------------------------------------------------------------------------------------------------------------------------------------------------------------------------------------------------------------------------------------------------------------------------------------------------------|-------------------------------------------------------------------------------------------------------------------------------------------------|-----------------------------------------------------------------------------------------|------------|-------------------------|----------------------------|
|                                                              |                                                                                                                                                                                                                                                                                                                                                                                                                                                                                                                                                                                                                                                                                                                                                                                                                                                                                                                                                                                                                                                                                                              |                                                                                                                                                 |                                                                                         | Baseline   | Post-results disclosure | 6m post-results disclosure |
| <b>Outcome Measure</b>                                       |                                                                                                                                                                                                                                                                                                                                                                                                                                                                                                                                                                                                                                                                                                                                                                                                                                                                                                                                                                                                                                                                                                              |                                                                                                                                                 |                                                                                         |            |                         |                            |
| Parent’s Expectations of Personal Utility of Genomic Results | <p>In this next section, we will ask you how useful you believe your child's test results will be in making future decisions. We know you have not yet received the results, but we want to know what you expect may happen when you do get them.</p> <p>Please indicate how useful you think your child's results will be for the following purposes:</p> <ol style="list-style-type: none"> <li>1. Help with my child’s life planning</li> <li>2. Inform plans for my child’s school or career</li> <li>5. Help me or our family mentally prepare for the future</li> <li>6. Help to better understand my child’s health</li> <li>7. Contribute to my child’s self-knowledge</li> <li>8. Help me cope with my child’s health risks</li> <li>9. Help me feel more in control of my child’s health</li> <li>10. Help me feel more in control of my child’s life</li> <li>11. Simply to provide information</li> <li>12. Satisfy my curiosity about my child</li> <li>13. Help my child use social programs, like resources and services</li> <li>14. Improve communication with my family members</li> </ol> | 1, Not at all useful   2, A little useful   3, Somewhat useful   4, Neutral   5, Useful   6, Very useful   7, Extremely useful   98, Don’t Know | CSER measure adapted for pediatric populations from the Personal Utility Scale (PrU)(1) | X          | -                       | -                          |

|                                                                     |                                                                                                                                                                                                                                                                                                                                                                                                                                                                                                                                                                                                                                                                                                                                                                                                                                                                                                                                                                                                                                                                                                                                                                                              |                                                                                                                                                     |                                                                                                |   |   |   |
|---------------------------------------------------------------------|----------------------------------------------------------------------------------------------------------------------------------------------------------------------------------------------------------------------------------------------------------------------------------------------------------------------------------------------------------------------------------------------------------------------------------------------------------------------------------------------------------------------------------------------------------------------------------------------------------------------------------------------------------------------------------------------------------------------------------------------------------------------------------------------------------------------------------------------------------------------------------------------------------------------------------------------------------------------------------------------------------------------------------------------------------------------------------------------------------------------------------------------------------------------------------------------|-----------------------------------------------------------------------------------------------------------------------------------------------------|------------------------------------------------------------------------------------------------|---|---|---|
|                                                                     | <p>15. Feel good about helping the medical community</p> <p>16. Feel good about having information for family members</p> <p>17. Feel good about taking responsibility for my child's health</p>                                                                                                                                                                                                                                                                                                                                                                                                                                                                                                                                                                                                                                                                                                                                                                                                                                                                                                                                                                                             |                                                                                                                                                     |                                                                                                |   |   |   |
| <p>Personal Utility of Genomic Results after Results Disclosure</p> | <p>In the next section, we will ask you questions about how useful your child's test results will be in making future decisions.</p> <p>Please indicate how useful you find the following outcomes of your child's test result:</p> <ol style="list-style-type: none"> <li>1. Help with my child's life planning</li> <li>2. Inform plans for my child's school or career</li> <li>5. Help me or our family mentally prepare for the future</li> <li>6. Help to better understand my child's health</li> <li>7. Contribute to my child's self-knowledge</li> <li>8. Help me cope with my child's health risks</li> <li>9. Help me feel more in control of my child's health</li> <li>10. Help me feel more in control of my child's life</li> <li>11. Simply to provide information</li> <li>12. Satisfy my curiosity about my child</li> <li>13. Help my child use social programs, like resources and services</li> <li>14. Improve communication with my family members</li> <li>15. Feel good about helping the medical community</li> <li>16. Feel good about having information for family members</li> <li>17. Feel good about taking responsibility for my child's health</li> </ol> | <p>1, Not at all useful   2, A little useful   3, Somewhat useful   4, Neutral   5, Useful   6, Very useful   7, Extremely useful   98, Refused</p> | <p>CSER measure adapted for pediatric populations from the Personal Utility Scale (PrU)(1)</p> | - | X | X |

**Table S3. Covariates and population characteristics included in the analysis**

*Provided as an excel due to size of table.*



**Table S4. Bivariate analyses of selected variables with Personal Utility Scale (PrU) summary score**

| <b>Bivariate Analysis of Variables</b>                  | <b>N<sup>a</sup></b> | <b>PrU Summary Score, M(SD)</b> | <b>P-Value<sup>b</sup></b> |
|---------------------------------------------------------|----------------------|---------------------------------|----------------------------|
| <b>Relationship to child</b>                            |                      |                                 |                            |
| Mother                                                  | 1562/1782            | 79.4 (21.7)                     | 0.27                       |
| Father                                                  | 143/1782             | 76.4 (22.5)                     |                            |
| Legal Guardian                                          | 77/1782              | 78.3 (23.0)                     |                            |
| <b>Health system</b>                                    |                      |                                 | 0.65                       |
| Montefiore Medical Center                               | 605/1782             | 79.4 (23.6)                     |                            |
| Mount Sinai Health System                               | 117/1782             | 79.0 (20.9)                     |                            |
| <b>Previous genetics testing</b>                        |                      |                                 | <b>0.008</b>               |
| No                                                      | 1056/1782            | 80.3 (21.5)                     |                            |
| Yes                                                     | 705/1782             | 77.5 (22.0)                     |                            |
| <b>Self-reported race and ethnicity<sup>c</sup></b>     |                      |                                 | <b>&lt;0.001</b>           |
| African American/Black                                  | 266/1782             | 77.8 (24.3)                     |                            |
| Hispanic/Latino(a)                                      | 830/1782             | 83.2 (20.4)                     |                            |
| White/European American                                 | 408/1782             | 73.5 (21.0)                     |                            |
| <b>How was the survey administered?</b>                 |                      |                                 | 0.98                       |
| Phone/Videoconference                                   | 1487/1782            | 79.1 (22.0)                     |                            |
| In-person                                               | 295/1782             | 79.1 (20.9)                     |                            |
| <b>Education level</b>                                  |                      |                                 | <b>&lt;0.001</b>           |
| < HS                                                    | 321/1782             | 81.9 (22.2)                     |                            |
| HS Grad/GED/Post-HS Training                            | 797/1782             | 82.5 (20.5)                     |                            |
| College graduate                                        | 355/1782             | 75.4 (21.9)                     |                            |
| > College graduate                                      | 303/1782             | 72.0 (22.5)                     |                            |
| <b>Insurance Type</b>                                   |                      |                                 | <b>&lt;0.001</b>           |
| Public                                                  | 1150/1782            | 81.3 (21.3)                     |                            |
| Private                                                 | 632/1782             | 75.2 (22.3)                     |                            |
| <b>Case-level interpretation of genetic test result</b> |                      |                                 | <b>&lt;0.001</b>           |
| Positive/Likely Positive                                | 315/1782             | 89.1 (18.2)                     |                            |
| Uncertain                                               | 906/1782             | 76.4 (21.6)                     |                            |
| Negative                                                | 561/1782             | 78.0 (22.6)                     |                            |
| <b>Language of Survey during Immediate Timepoint</b>    |                      |                                 | <b>&lt;0.001</b>           |
| Spanish                                                 | 402/1782             | 85.0 (19.9)                     |                            |
| English                                                 | 1380/1782            | 77.4 (22.1)                     |                            |
| <b>Language of Survey during 6m Timepoint</b>           |                      |                                 | <b>&lt;0.001</b>           |
| Spanish                                                 | 1327/1782            | 84.6 (20.6)                     |                            |
| English                                                 | 379/1782             | 77.7 (22.0)                     |                            |
| <b>Brief Health Literacy Score</b>                      | 1782/1782            | 79.1 (21.8)                     | <b>&lt;0.001</b>           |
| <b>Healthcare Distrust Values Subscale Score</b>        | 1780/1782            | 79.1 (21.8)                     | <b>&lt;0.001</b>           |
| <b>Healthcare Distrust Competence Subscale Score</b>    | 1780/1782            | 79.1 (21.8)                     | <b>&lt;0.001</b>           |

<sup>a</sup> N reflects number of responses from both timepoints: post-results disclosure and 6 months post-results disclosure. Variations in total N (N=1782) reflect missing values in the original variables.

<sup>b</sup> T-tests conducted for variables with 2 categories, one-way analysis of variance conducted for variables with 3 or more variables, Pearson's correlation conducted for continuous variables.

<sup>c</sup> Only the three largest race and ethnicity groups used in the bivariate analysis: African American/Black, Hispanic/Latino(a) and White/European American.

Abbreviations: HS: High school; GED: General Education Development Test

**Table S5. Multivariate linear regression of the personal utility summary score assessed at post-results disclosure using measures of understanding and mode of result delivery**

|                                              | Full Sample (N=912) <sup>a</sup> |                  | EA Only (N=212)       |                  | AA Only (N=137)      |              | H/L Only (N=417)     |                  |
|----------------------------------------------|----------------------------------|------------------|-----------------------|------------------|----------------------|--------------|----------------------|------------------|
|                                              | β (95% CI)                       | p-value          | β (95% CI)            | p-value          | β (95% CI)           | p-value      | β (95% CI)           | p-value          |
| <b>Measures of Understanding</b>             |                                  |                  |                       |                  |                      |              |                      |                  |
| <b>Perceived Understanding</b>               |                                  |                  |                       |                  |                      |              |                      |                  |
| Level 2 vs Level 1                           | 6.84 (2.22, 11.46)               | <b>0.004</b>     | 19.47 (5.81, 33.12)   | <b>0.005</b>     | 10.39 (-2.34, 23.11) | <b>0.109</b> | 7.52 (1.33, 13.70)   | <b>0.017</b>     |
| Level 3 vs Level 1                           | 10.17 (5.81, 14.56)              | <b>&lt;0.001</b> | 22.18 (9.27, 35.10)   | <b>0.001</b>     | 18.18 (5.19, 31.16)  | <b>0.007</b> | 9.26 (3.58, 14.94)   | <b>0.001</b>     |
| <b>Objective Understanding Summary Score</b> | -2.27 (-3.46, -1.08)             | <b>&lt;0.001</b> | -2.83 (-5.92, 0.27)   | 0.073            | -5.01 (-8.67, -1.34) | <b>0.008</b> | -1.72 (-3.35, -0.09) | <b>0.038</b>     |
| <b>Mode of Result Disclosure</b>             |                                  |                  |                       |                  |                      |              |                      |                  |
| In Person vs Telehealth                      | -0.97 (-4.45, 2.50)              | 0.583            | 1.81 (-5.94, 9.56)    | 0.646            | 4.40 (-6.04, 14.83)  | 0.405        | 0.59 (-4.30, 5.47)   | 0.814            |
| <b>Socioeconomic Factors</b>                 |                                  |                  |                       |                  |                      |              |                      |                  |
| <b>Education Level</b>                       |                                  |                  |                       |                  |                      |              |                      |                  |
| HS/GED/Post-HS training vs <HS               | 1.59 (-2.13, 5.31)               | 0.402            | -1.73 (-22.11, 18.65) | 0.867            | 4.78 (-5.89, 15.46)  | 0.376        | 3.21 (-1.21, 7.63)   | 0.154            |
| College Graduate vs <HS                      | -4.52 (-9.01, -0.02)             | <b>0.049</b>     | -7.04 (-27.77, 13.69) | 0.504            | 5.73 (-7.95, 19.42)  | 0.408        | -1.46 (-7.39, 4.46)  | 0.628            |
| College+ vs <HS                              | -5.14 (-10.07, -0.22)            | <b>0.041</b>     | -1.49 (-22.22, 19.23) | 0.887            | -5.61 (-20.87, 9.65) | 0.468        | -5.4 (-14.09, 3.29)  | 0.223            |
| <b>Survey Language</b>                       |                                  |                  |                       |                  |                      |              |                      |                  |
| Spanish vs English                           | 1.65 (-1.95, 5.26)               | 0.368            | - <sup>b</sup>        | -                | 9.33 (-20.99, 39.65) | 0.543        | -0.38 (-4.72, 3.97)  | 0.864            |
| <b>Insurance Type</b>                        |                                  |                  |                       |                  |                      |              |                      |                  |
| Private vs Public                            | -2.09 (-5.09, 0.90)              | 0.171            | 5.10 (-1.29, 11.49)   | 0.117            | -1.62 (-9.88, 6.63)  | 0.698        | -4.99 (-9.84, -0.14) | <b>0.044</b>     |
| <b>Health Literacy Score</b>                 | -0.48 (-0.90, -0.05)             | <b>0.027</b>     | -0.91 (-2.13, 0.30)   | 0.141            | -1.19 (-2.57, 0.18)  | 0.088        | -0.28 (-0.81, 0.25)  | 0.295            |
| <b>Healthcare Distrust</b>                   |                                  |                  |                       |                  |                      |              |                      |                  |
| Values Subscale                              | 0.23 (-0.22, 0.68)               | 0.319            | 0.89 (-0.130- 1.92)   | 0.087            | -0.68 (-1.96, 0.59)  | 0.290        | 0.36 (-0.28, 0.99)   | 0.273            |
| Competence Subscale                          | -0.76 (-1.33, -0.18)             | <b>0.010</b>     | -1.51 (-2.73, -0.29)  | <b>0.016</b>     | -0.52 (-2.14, 1.10)  | 0.528        | -0.67 (-1.52, 0.19)  | 0.126            |
| <b>Clinical Factors</b>                      |                                  |                  |                       |                  |                      |              |                      |                  |
| <b>Case-Level Clinical Interpretation</b>    |                                  |                  |                       |                  |                      |              |                      |                  |
| Positive/Likely Positive vs Negative         | 14.62 (10.85, 18.39)             | <b>&lt;0.001</b> | 15.12 (6.89, 23.35)   | <b>&lt;0.001</b> | 21.29 (8.67, 33.91)  | <b>0.001</b> | 13.89 (8.70, 19.07)  | <b>&lt;0.001</b> |
| Uncertain vs Negative                        | -0.66 (-3.63, 2.31)              | 0.663            | 0.08 (-6.69, 6.85)    | 0.981            | -4.99 (-13.95, 3.97) | 0.272        | 1.70 (-2.48, 5.88)   | 0.425            |
| <b>Previous Genetic Testing</b>              |                                  |                  |                       |                  |                      |              |                      |                  |
| Yes vs No                                    | -2.12 (-4.74, 0.50)              | 0.112            | -3.5 (-9.15, 2.16)    | 0.225            | 6.56 (-1.79, 14.91)  | 0.122        | -4.29 (-8.06, -0.53) | <b>0.026</b>     |

<sup>a</sup> While not shown, all models controlled for the genetic counselor who returned the results.

<sup>b</sup> Language omitted from model due to collinearity.

Abbreviations: EA: White or European American; AA: Black or African American; H/L= Hispanic/Latino(a)

**Table S6. Multivariate linear regression of the personal utility summary score assessed at 6m post-results disclosure using measures of understanding and mode of result delivery**

|                                              | Full Sample (N=800) <sup>a</sup> |                  | EA Only (N=183)       |              | AA Only (N=116)        |              | H/L Only (N=380)     |              |
|----------------------------------------------|----------------------------------|------------------|-----------------------|--------------|------------------------|--------------|----------------------|--------------|
|                                              | β (95% CI)                       | p-value          | β (95% CI)            | p-value      | β (95% CI)             | p-value      | β (95% CI)           | p-value      |
| <b>Measures of Understanding</b>             |                                  |                  |                       |              |                        |              |                      |              |
| <b>Perceived Understanding</b>               |                                  |                  |                       |              |                        |              |                      |              |
| Level 2 vs Level 1                           | 6.91 (2.71, 11.11)               | <b>0.001</b>     | 1.19 (-9.87, 12.24)   | 0.833        | 6.65 (-5.46, 18.76)    | 0.278        | 4.36 (-1.41, 10.13)  | 0.138        |
| Level 3 vs Level 1                           | 8.00 (3.94, 12.06)               | <b>&lt;0.001</b> | 5.33 (-5.54, 16.21)   | 0.334        | 5.35 (-7.13, 17.82)    | 0.397        | 6.77 (1.24, 12.30)   | <b>0.017</b> |
| <b>Objective Understanding Summary Score</b> | -1.19 (-2.43, 0.04)              | 0.058            | -0.37 (-3.31, 2.58)   | 0.805        | 2.53 (-1.82, 6.87)     | 0.250        | -1.21 (-2.88, 0.45)  | 0.153        |
| <b>Mode of Result Disclosure</b>             |                                  |                  |                       |              |                        |              |                      |              |
| In Person vs Telehealth                      | 1.17 (-2.96, 5.29)               | 0.579            | 1.40 (-7.03, 9.84)    | 0.743        | -1.32 (-15.04, 12.41)  | 0.849        | 2.95 (-2.90, 8.81)   | 0.322        |
| <b>Socioeconomic Factors</b>                 |                                  |                  |                       |              |                        |              |                      |              |
| <b>Education Level</b>                       |                                  |                  |                       |              |                        |              |                      |              |
| HS/GED/Post-HS training vs <HS               | 0.73 (-3.66, 5.13)               | 0.744            | -1.31 (-23.02, 20.41) | 0.906        | 14.41 (-0.09, 28.91)   | 0.051        | -0.88 (-6.08, 4.32)  | 0.740        |
| College Graduate vs <HS                      | -2.85 (-8.18, 2.48)              | 0.294            | 0.95 (-21.17, 23.08)  | 0.932        | 6.94 (-10.81, 24.69)   | 0.439        | -5.43 (-12.49, 1.63) | 0.131        |
| College+ vs <HS                              | -7.33 (-13.18, -1.48)            | <b>0.014</b>     | 0.16 (-21.94, 22.25)  | 0.989        | -6.55 (-25.76, 12.66)  | 0.500        | -9.75 (-19.71, 0.22) | 0.055        |
| <b>Survey Language</b>                       |                                  |                  |                       |              |                        |              |                      |              |
| Spanish vs English                           | 2.44 (-1.81, 6.69)               | 0.260            | -. <sup>b</sup>       | -            | -. <sup>b</sup>        | -            | -0.18 (-5.15, 4.79)  | 0.942        |
| <b>Insurance Type</b>                        |                                  |                  |                       |              |                        |              |                      |              |
| Private vs Public                            | -3.09 (-6.62, 0.44)              | 0.086            | -2.05 (-9.285, 5.179) | 0.576        | 0.57 (-9.80, 10.93)    | 0.914        | -4.64 (-10.18, 0.90) | 0.101        |
| <b>Health Literacy Score</b>                 | -0.12 (-0.61, 0.37)              | 0.632            | -1.11 (-2.48, 0.29)   | 0.119        | 0.3 (-1.41, 2.01)      | 0.725        | 0.12 (-0.493, 0.732) | 0.701        |
| <b>Healthcare Distrust</b>                   |                                  |                  |                       |              |                        |              |                      |              |
| Values Subscale                              | -0.27 (-0.80, 0.26)              | 0.316            | 0.78 (-0.34, 1.91)    | 0.171        | -1.23 (-2.86, 0.41)    | 0.139        | -0.12 (-0.86, 0.63)  | 0.755        |
| Competence Subscale                          | -0.64 (-1.32, 0.04)              | 0.067            | -1.36 (-2.75, 0.03)   | 0.056        | -0.27 (-2.30, 1.77)    | 0.796        | -0.91 (-1.91, 0.09)  | 0.075        |
| <b>Clinical Factors</b>                      |                                  |                  |                       |              |                        |              |                      |              |
| <b>Case-Level Clinical Interpretation</b>    |                                  |                  |                       |              |                        |              |                      |              |
| Positive/Likely Positive vs Negative         | 7.18 (2.82, 11.54)               | <b>0.001</b>     | 9.78 (0.75, 18.80)    | <b>0.034</b> | 1.72 (-13.81, 17.25)   | 0.827        | 5.57 (-0.47, 11.60)  | 0.071        |
| Uncertain vs Negative                        | -3.48 (-6.93, -0.02)             | <b>0.049</b>     | -3.36 (-11.31, 4.59)  | 0.405        | -11.97 (-23.16, -0.78) | <b>0.036</b> | -1.6 (-6.45, 3.26)   | 0.518        |
| <b>Previous Genetic Testing</b>              |                                  |                  |                       |              |                        |              |                      |              |
| Yes vs No                                    | -2.32 (-5.39, 0.74)              | 0.137            | -9.24 (-15.66, -2.82) | <b>0.005</b> | -1.21 (-11.27, 8.86)   | 0.812        | 0.77 (-3.63, 5.16)   | 0.732        |

<sup>a</sup> While not shown, all models controlled for the genetic counselor who returned the results.

<sup>b</sup> Language omitted from model due to collinearity.

Abbreviations: EA: White or European American; AA: Black or African American; H/L= Hispanic/Latino(a)

## References

1. Turbitt, Erin et al. "The PrU: Development and validation of a measure to assess personal utility of genomic results." *Genetics in medicine : official journal of the American College of Medical Genetics* vol. 25,3 (2023): 100356. doi:10.1016/j.gim.2022.12.003
2. Williams Institute (University of California, Los Angeles. School of Law). *Best Practices for Asking Questions to Identify Transgender and Other Gender Minority Respondents on Population-based Surveys*. 2014.
3. Website [Internet]. Available from: Jones NA. Update on the U.S. Census Bureau's Race and Ethnic Research for the 2020 Census. *Survey News* 2015;3(5). ([https://www.census.gov/content/dam/Census/newsroom/press-kits/2014/article\\_race\\_ethnic\\_research\\_2020census\\_jones.pdf](https://www.census.gov/content/dam/Census/newsroom/press-kits/2014/article_race_ethnic_research_2020census_jones.pdf))
4. 1999-2000 Questionnaire Data - Continuous NHANES [Internet]. [cited 2023 Jun 2]. Available from: <https://wwwn.cdc.gov/nchs/nhanes/search/DataPage.aspx?Component=Questionnaire&CycleBeginYear=1999>
5. Horowitz CR, Abul-Husn NS, Ellis S, Ramos MA, Negron R, Suprun M, et al. Determining the effects and challenges of incorporating genetic testing into primary care management of hypertensive patients with African ancestry. *Contemp Clin Trials*. 2016 Mar;47:101–8.
6. Haun, J., Noland Dodd, V. J., Graham-Pole, J., Rienzo, B., & Donaldson, P. (2009). Testing a Health Literacy Screening Tool: Implications for Utilization of a BRIEF Health Literacy Indicator. *Federal Practitioner*, 26(12), 24-31
7. Shea, Judy A et al. "Development of a revised Health Care System Distrust scale." *Journal of general internal medicine* vol. 23,6 (2008): 727-32. doi:10.1007/s11606-008-0575-3
8. MUA Find [Internet]. [cited 2023 Jun 2]. Available from: <https://data.hrsa.gov/tools/shortage-area/mua-find>
